# Supplementary material
Source: PubMed Central journal article supplement (PMC8703366)
Supplement: bloodBLD2021011525-suppl1.pdf [file bloodBLD2021011525-suppl1.pdf]

1 **Title: Gasdermin D inhibition prevents multiple organ dysfunction during sepsis**  
2 **by blocking NET formation**

3  
4 **Short title: Gasdermin D is a target to improve sepsis outcomes**

5  
6 **Authors:** PhD Camila Meirelles Silva<sup>1,2,3</sup>; PhD Carlos Wagner Wanderley<sup>1,3</sup>; PhD Flavio  
7 P. Veras<sup>1</sup>; PhD Fabiane Sonego<sup>1</sup>; PhD Daniele C. Nascimento<sup>1,2,3</sup>; PhD Augusto V.  
8 Gonçalves<sup>1,4</sup>; MSc Timna V. Martins<sup>1,2</sup>; PhD David F. Cólón<sup>1,2</sup>; PhD Vanessa F.  
9 Borges<sup>1,3</sup>; PhD Verônica S. Brauer<sup>2</sup>; MSc. Luis Eduardo Alves Damasceno<sup>1,2</sup>; PhD  
10 Katiussia P. Silva<sup>1,5</sup>; PhD Juliana E. Toller<sup>1</sup>; MSc. Sabrina Setembre Batah<sup>6</sup>; MSc Ana  
11 Letícia J. Souza<sup>1,3</sup>; MSc Valter V. Silva Monteiro<sup>1,2</sup>; PhD Antônio Edson R. Oliveira<sup>1</sup>; PhD  
12 Paula B. Donate<sup>1,3</sup>; MD Daniel Zoppi<sup>7</sup>; PhD Marcos C. Borges<sup>7</sup>; PhD Fausto Almeida<sup>2</sup>;  
13 PhD Helder I Nakaya<sup>1</sup>; PhD Alexandre Fabro<sup>6</sup>; PhD Thiago M. Cunha<sup>1,3</sup>; PhD José  
14 Carlos Alves-Filho<sup>1,3</sup>; PhD Dario Zamboni<sup>1,4</sup>; PhD Fernando Q. Cunha<sup>1,3</sup>.

15  
16 **Affiliations:**

17 <sup>1</sup>Center for Research in Inflammatory Diseases (CRID), Ribeirao Preto Medical School,  
18 University of Sao Paulo, Ribeirao Preto, Sao Paulo, Brazil.

19 <sup>2</sup>Department of Biochemistry and Immunology, Ribeirao Preto Medical School,  
20 University of Sao Paulo, Ribeirao Preto, Sao Paulo, Brazil.

21 <sup>3</sup>Department of Pharmacology, Ribeirao Preto Medical School, University of Sao Paulo,  
22 Ribeirao Preto, Sao Paulo, Brazil.

23 <sup>4</sup>Department of Cellular and Molecular Biology and Pathogenic Bioagents, Ribeirao  
24 Preto Medical School, University of Sao Paulo, Ribeirao Preto, Sao Paulo, Brazil.

25 <sup>5</sup>Sao Paulo State University, Institute of Biosciences, Botucatu, Sao Paulo, Brazil.

26 <sup>6</sup>Pathology and Legal Medicine, Ribeirao Preto Medical School, University of São Paulo,  
27 Ribeirao Preto, São Paulo, Brazil

28 <sup>7</sup>Department of Internal Medicine, Ribeirao Preto Medical School, University of Sao  
29 Paulo, Ribeirao Preto, Sao Paulo, Brazil.

30

31

32

33

34

35

36

37

38

39

40

41

42

43

44

45

46

47

## 48 Supplemental figures

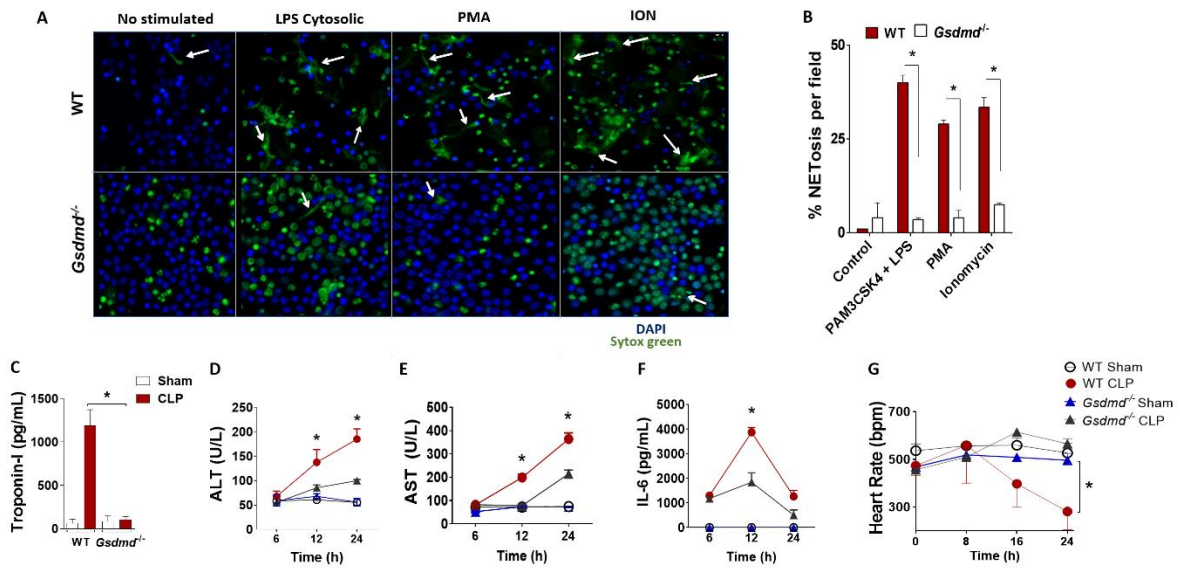

49  
 50 **Supplemental figure 1. Gasdermin D deficiency reduces NETs release and**  
 51 **circulating levels of organ-injury markers and inflammatory cytokines.** (A) Bone  
 52 marrow neutrophils from WT and *Gsdmd*<sup>-/-</sup> mice were primed with PAM3CSK4 (1 µg/ml)  
 53 for 4 h and then transfected with ultrapure LPS (10 µg/ml) or stimulated with PMA (50  
 54 nM) or ionomycin (5 µM) for 4 h. NETosis of mice neutrophils was detected by the  
 55 extracellular DNA marker SYTOX green. (B) Microscopy images were blinded and  
 56 quantified for the percentage of NETosis per field, where cells with delobulated nuclei  
 57 and diffuse/spread DNA were counted as the cells undergoing NETosis. Quantitative  
 58 analysis of NETs, PAM3CSK4+LPS, PMA, or ionomycin stimuli. (C) The circulating  
 59 levels of troponin-I in *Gsdmd*<sup>-/-</sup>. (D and E) The plasma levels of ALT and AST and (F) IL-  
 60 6 were determined at 6, 12 and 24 h after sepsis induction by CLP in *Gsdmd*<sup>-/-</sup> mice. (G)  
 61 Heart rate was continuously monitored by telemetry, through which we calculated the  
 62 mean arterial pressure for 24 h after sepsis induction. The data are the mean ± SEM  
 63 (\*p<0.05 one-way ANOVA, followed by Tukey B and C; D-G WT CLP vs *Gsdmd*<sup>-/-</sup> CLP  
 64 t-test in D-G). Data are representative of at least two independent experiments, each  
 65 including 5-7 animals per group.

66  
 67  
 68  
 69  
 70  
 71  
 72  
 73

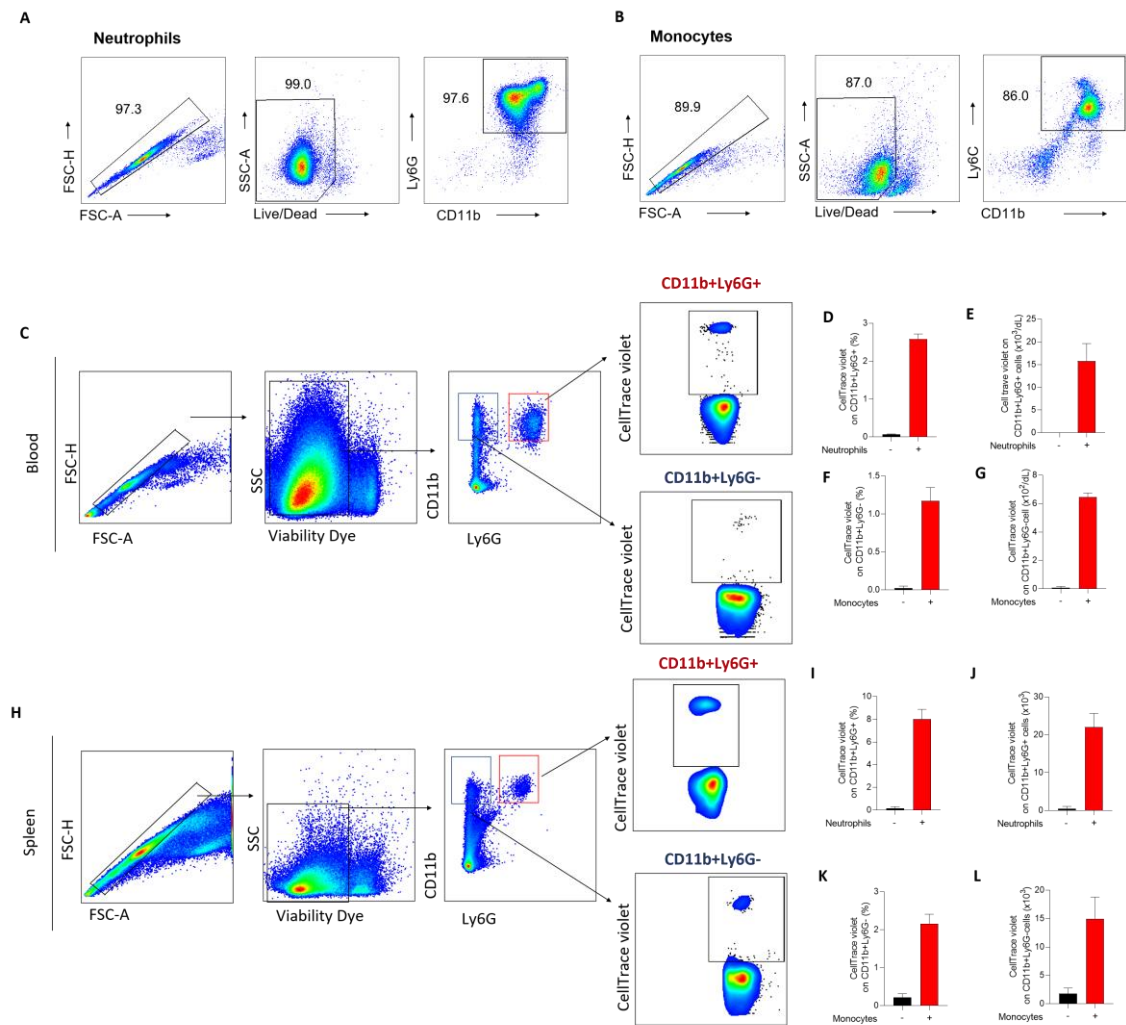

74  
75  
76  
77  
78  
79  
80  
81  
82  
83  
84  
85  
86  
87  
88  
89  
90  
91  
92  
93

**Supplemental figure 2. Viability of WT-neutrophils and -monocytes 12 hours after transfer to *Gsdmd*<sup>-/-</sup> mice.** (A-B) Mouse bone marrow neutrophils (97.6% of viable CD11b+Ly6G+ cells) and monocytes (86% of viable CD11b+Ly6C+ cells) were isolated from WT-mice. Further, these cells were stained with 5 uM CellTrace™ dye and injected (1 × 10<sup>7</sup> cells/mouse, i.v) in *Gsdmd*<sup>-/-</sup> mice. Then, 12 h after transfer, blood and spleen samples were collected to analyze the viability of transferred neutrophils and monocytes. (C) Gating strategy: after gating for singlets (FSC-H vs. FSC-A) viable cells were gated for viability dye negative. Next the neutrophils (CD11b+/Ly6G+) and monocytes (CD11b+/Ly6G-) were gated to determine the population stained with CellTracer Dye. (D-E) Quantification of transfer neutrophils in the blood. (F-G) Quantification of transfer monocytes in the blood. (H) Gating strategy: after gating for singlets (FSC-H vs. FSC-A), viable cells were gated for viability dye negative, next the neutrophils (CD11b+/Ly6G+) and monocytes (CD11b+/Ly6G-) were gated to determine the population stained with CellTracer Dye. (I-J and K-L) Quantification of transfer WT neutrophils and monocytes in the spleen, respectively. Data are representative of at least two independent experiments, each including 4-6 animals per group.

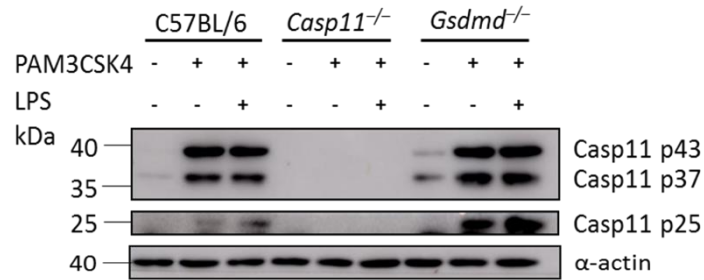

94  
95  
96  
97  
98  
99  
100  
101  
102

**Supplemental figure 3. Caspase 11 activation is not affected in neutrophils with gasdermin D deficiency.** Bone marrow neutrophils from WT *Casp11*<sup>-/-</sup> and *Gsdmd*<sup>-/-</sup> mice were primed with PAM3CSK4 (1 μg/ml) for 4 h and then transfected with ultrapure LPS (10 μg/ml) for 4h. The cell lysates were harvested for immunoblot analysis of pro-caspase-11 (p43 and p37) and its cleaved fraction caspase-11 (p25). Actin (α-actin) was used as a loading control. Data are representative of at least two independent experiments.

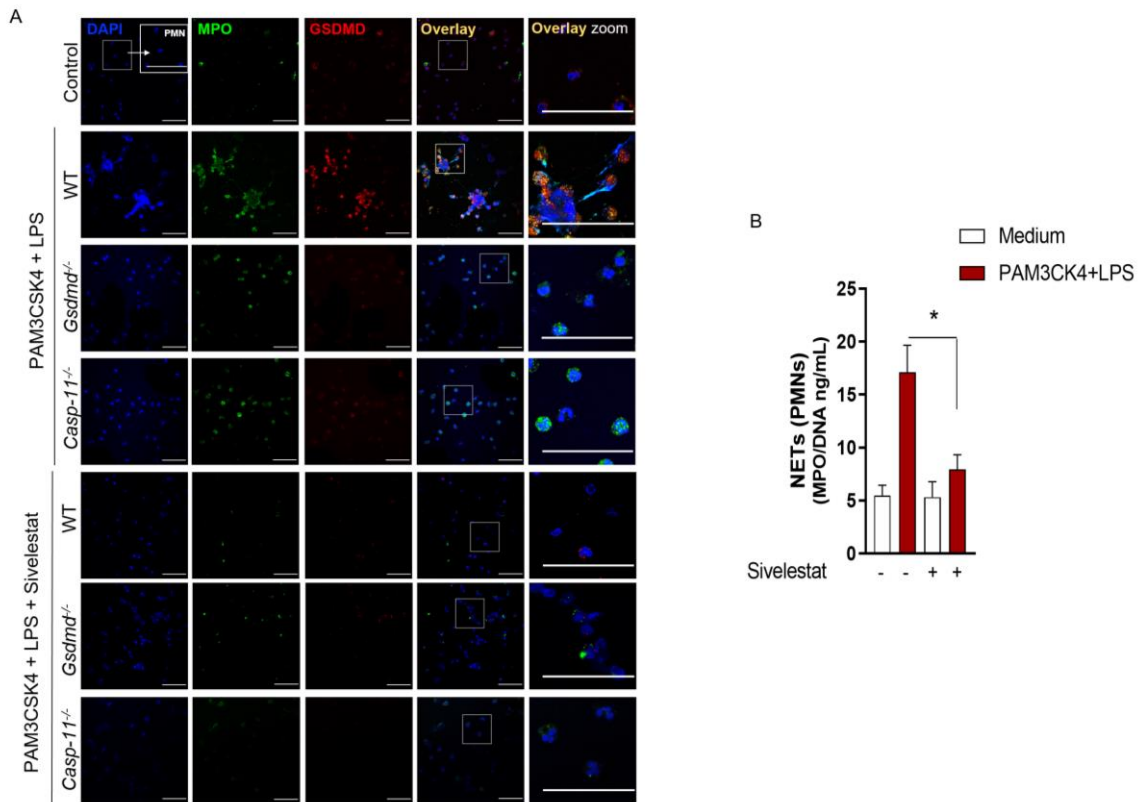

103  
104  
105  
106  
107  
108  
109  
110  
111  
112

**Supplemental figure 4. Neutrophil elastase mediates activation of gasdermin D and NETs production** (A) Bone marrow neutrophils from WT, *Gsdmd*<sup>-/-</sup> and *Casp11*<sup>-/-</sup> mice were treated with Sivelestat (Neutrophil elastase inhibitor, 10 μM) and primed with PAM3CSK4 (1 μg/ml) for 4h and then transfected with ultrapure LPS (10 μg/ml) for 4h. Representative fluorescence images of NETs stained for DNA (DAPI, blue), myeloperoxidase (MPO, green), and gasdermin D cleaved fraction (GSDMD, red) are shown. The scale bar indicates 50 μm at a 630x magnification. (B) The concentrations of MPO/DNA-NETs in the neutrophil culture supernatant after 4h of stimuli were determined by a picogreen test. Data are representative of at least two independent experiments.

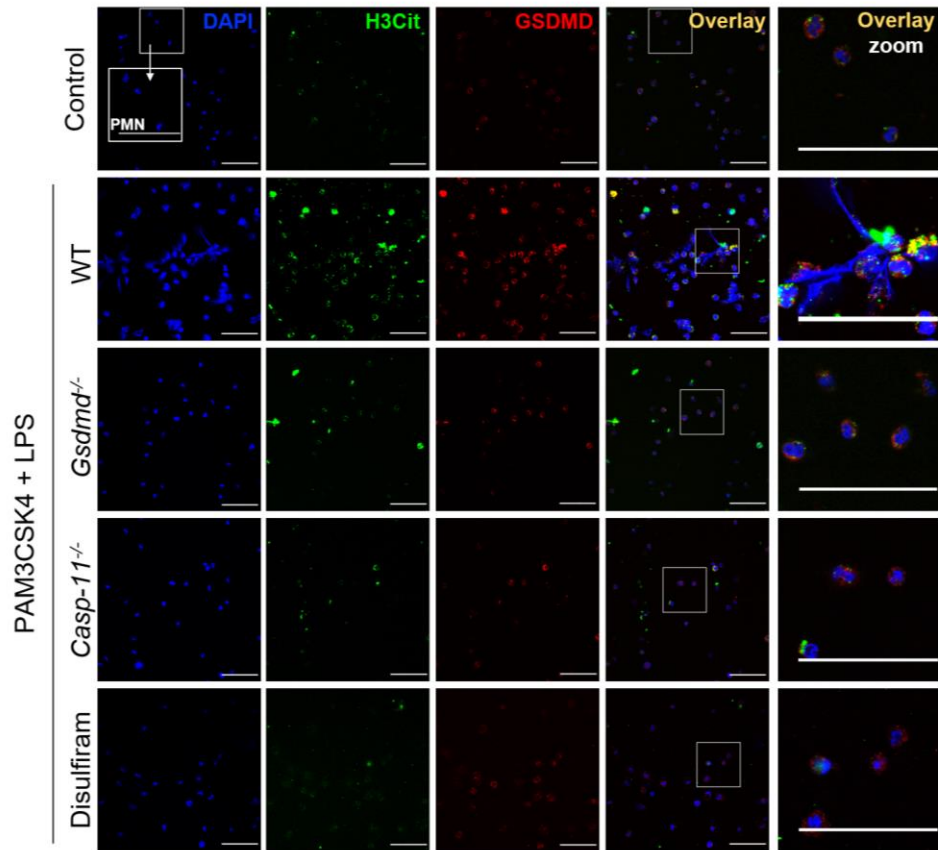

113  
 114  
 115  
 116  
 117  
 118  
 119  
 120  
 121  
 122  
 123  
 124  
 125  
 126  
 127

**Supplemental figure 5. Inhibition of gasdermin D reduces histone H3 citrullination.**

Bone marrow neutrophils from WT, *Casp11<sup>-/-</sup>*, *Gsdmd<sup>-/-</sup>* mice or WT neutrophils treated with disulfiram were primed with PAM3CSK4 (1  $\mu\text{g}/\text{ml}$ ) for 4h and transfected with ultrapure LPS (10  $\mu\text{g}/\text{ml}$ ) for more than 4h. Representative fluorescence images of NETs stained for DNA (DAPI, blue), citrullinated histone H3 (H3Cit, green), and gasdermin D cleaved fraction (GSDMD, red) are shown. The scale bar indicates 50  $\mu\text{m}$  at a 630x magnification. Data are representative of at least two independent experiments.

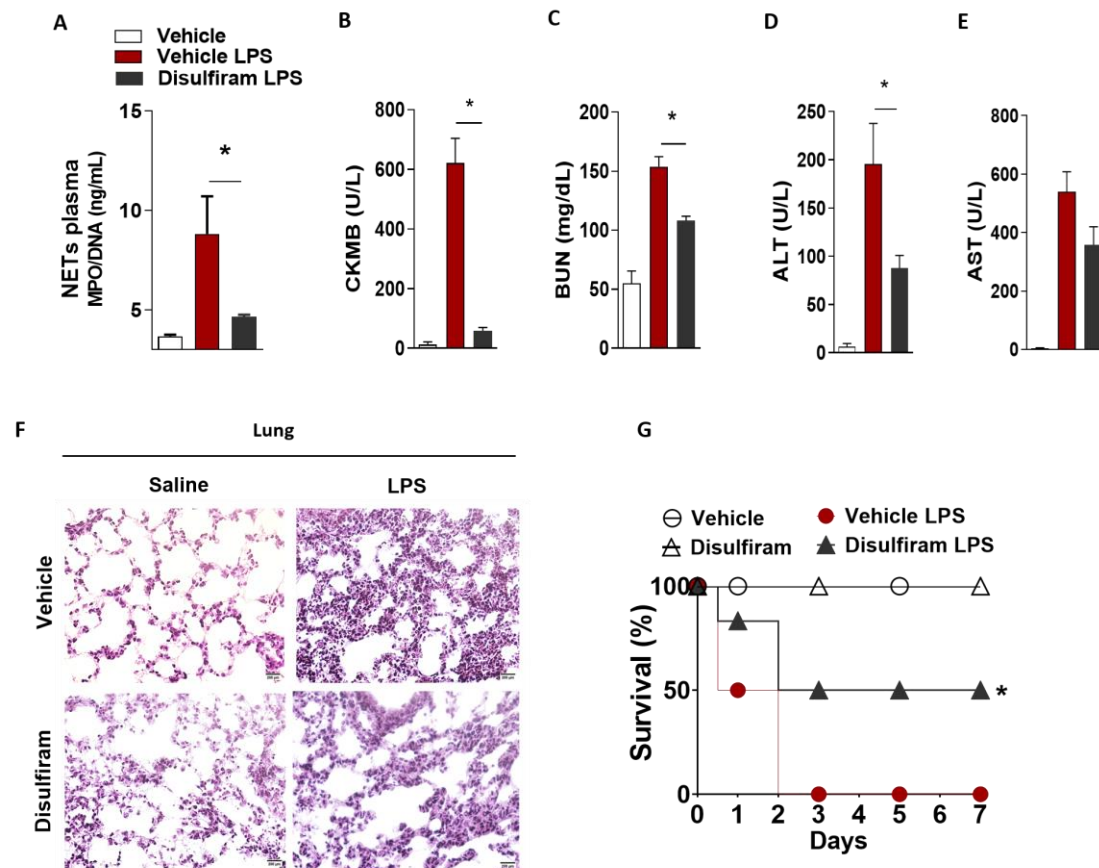

128  
129  
130  
131  
132  
133  
134  
135  
136  
137  
138  
139  
140  
141  
142  
143  
144  
145  
146  
147  
148

**Supplemental figure 6. Gasdermin D pharmacological inhibition reduces the deleterious effects of endotoxemia in mice.** Mice were pretreated with disulfiram (80 mg/kg) or vehicle by subcutaneous injection 24 and 4 h before intraperitoneal challenge with LPS (10 mg/kg). Subsequently, the mice were treated at 6 h and 18 h after LPS injection. (A) The MPO/DNA-NETs concentration in the plasma was determined 24 h post-challenge with LPS. (B-E) The systemic levels of organ injury markers were determined 24 h after LPS injection. (F) Representative images of H&E staining of the lung tissue sections 24 h after LPS injection are shown. The scale bar indicates 400x magnification. (G) The mice were pretreated with disulfiram (80 mg/kg) or vehicle by subcutaneous injection 24 and 4 h before endotoxemia, 6 h after LPS, and every 12 h for 2 days and followed for survival. The data are the mean  $\pm$  SEM (\* $p$ <0.05, one-way ANOVA, followed by Tukey in A- E; H-Mantel-Cox log-rank test in G). Data are representative of at least two independent experiments, each including 5-7 animals per group.

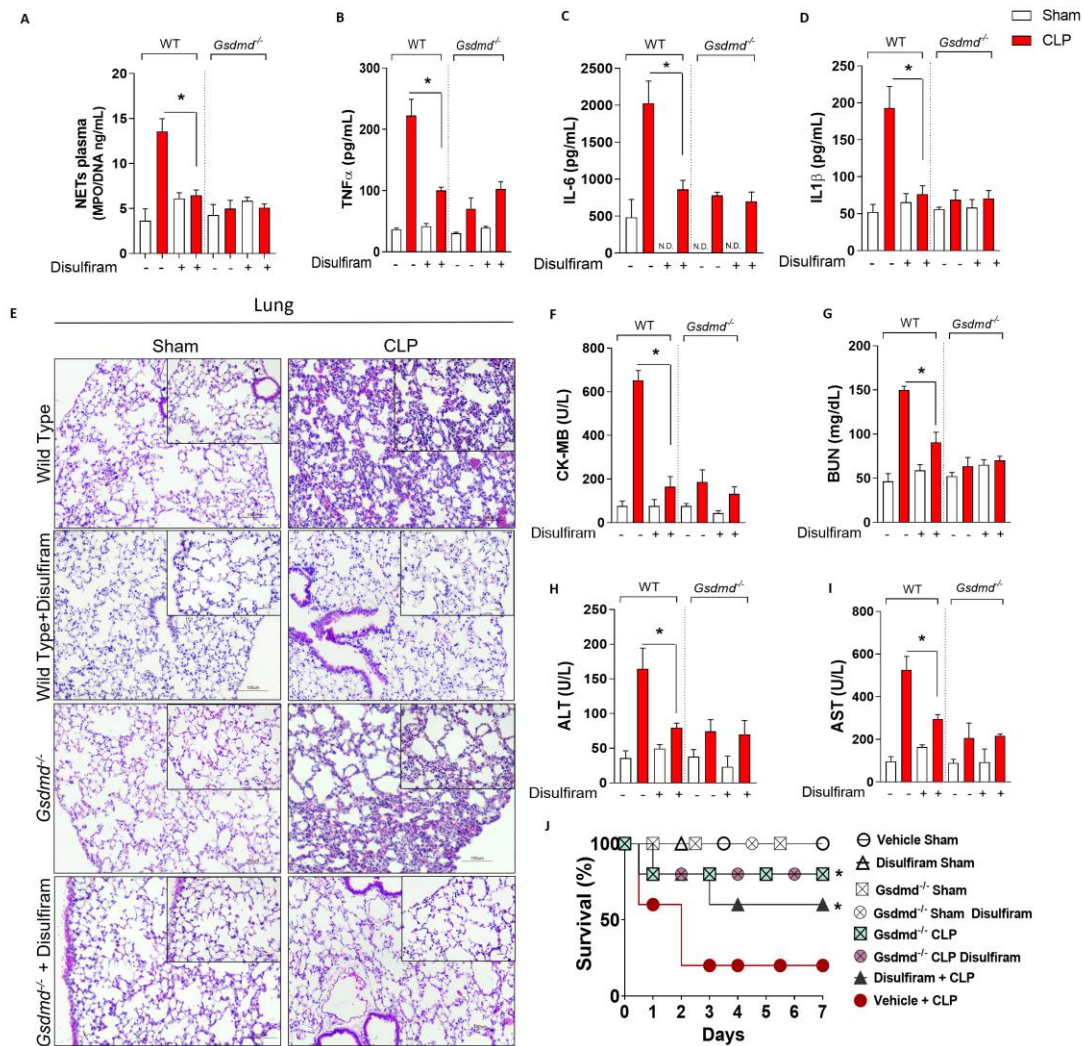

149  
150  
151  
152  
153  
154  
155  
156  
157  
158  
159  
160  
161  
162  
163  
164  
165  
166  
167  
168  
169

**Supplemental figure 7. The effects of disulfiram on sepsis are dependent on gasdermin D.** The WT or *Gsdmd*<sup>-/-</sup> mice were pretreated with disulfiram (80 mg/kg) or vehicle by subcutaneous injection 24 and 4 h before CLP-induced sepsis, 6 h after CLP and every 12 h for 2 days and followed for survival analysis. (A) The MPO/DNA-NETs concentration in the plasma was determined 24 h post-CLP-induced sepsis. (B-D) The systemic levels of TNF-α, IL-6, and IL-1β were measured by ELISA 24 h post-CLP-induced sepsis. (E) Representative images of the histological staining of the lung sections performed 24h after sepsis induction are shown at a 200x magnification. The square insets represent the image at a 400x magnification. (F-I) The circulating levels of organ injury markers were determined 24h after sepsis induction by CLP. (J) Overall survival. The data are the mean ± SEM (\*p<0.05, one-way ANOVA, followed by Tukey in A-D and F-I; H-Mantel-Cox Log-rank test in J). Data are representative of at least two independent experiments, each including 5-7 animals per group.

170 **Supplemental material and methods**

171

172 **Blood pressure measurement by telemetry**

173 A Data Sciences International (St. Paul, MN) telemetry system was used for the  
174 measurement of cardiovascular parameters. The mice were anesthetized with isoflurane  
175 (2% for induction and 1% for maintenance), after which the left carotid was exposed for  
176 implantation surgery of a radio-telemeter transmitter (TA11PA-C10; Data Sciences, St.  
177 Paul, MN, USA). Seven days after the implantation surgery, the mice were ready to be  
178 recorded, which occurred while they were awake in their cages and in a continuous way,  
179 starting after the electromagnetic command. The data were acquired and analyzed using  
180 the Labchart 8 (Ad Instruments) software. The data were expressed as mean arterial  
181 pressure in millimeters of mercury (MAP, mmHg) and heart rate (HR) in beats per minute  
182 (bpm).

183

184 **NETs quantification by High Content Analysis**

185 Isolated neutrophils from WT, Casp11, and GSDMD mice were cultured in RPMI medium  
186 supplemented with SYTOX green, and DAPI stimulated with cytosolic LPS, PMA,  
187 ionomycin, or culture medium (as negative control) and incubated for 4 h. Fluorescent  
188 and bright-field images (356.4 × 356.4 μm) were acquired using an ImageXpress Micro  
189 XLS Widefield High-Content Analysis System with a 0.60 numerical aperture 40×  
190 objective. Fluorescent images were acquired using a DAPI filter with excitation of 377/50  
191 nm and an emission of 447/60 nm, with an exposure time of 100 ms, and a FITC filter  
192 with excitation and emission wavelengths of 482/35 nm and 536/40 nm, with an exposure  
193 time of 10 ms (adapted from 1). After the acquisition, the images positive for SYTOX  
194 green were quantified as NETs.

195

196 **References**

197 1. Colon DF, Wanderley CW, Franchin M, Silva CM, Hiroki CH, Castanheira FVS, Donate  
198 PB. Neutrophil extracellular traps (NETs) exacerbate severity of infant sepsis. Crit Care  
199 2019; 23: 113.
